# Supplementary material for: Signatures and Prognostic Values of Related Immune Targets in Tongue Cancer
Source: Research Square preprint supplement (doi:10.21203/rs.3.rs-997544/v1), 2021-11-29
Supplement: Supplementary file 1 [file 20cd883328f468d8d14b87dd.docx]

|  | GSE13601(57) | GSE34105(78) | GSE34106(43) |
| --- | --- | --- | --- |
| Total samples | 57 | 78 | 43 |
| TUMOR | 31 | 62 | 28 |
| NORMAL | 26 | 16 | 15 |
| [Platform](C:/Users/nn/AppData/Local/youdao/dict/Application/8.9.6.0/resultui/html/index.html" \l "/javascript:;) | GPL8300 Affymetrix Human Genome U95 Version 2 Array | GPL14951  Illumina HumanHT-12 WG-DASL V4.0 R2 expression beadchip | GPL14951  Illumina HumanHT-12 WG-DASL V4.0 R2 expression beadchip |

**Supplementary table 1**

**Total samples/[Platform](C:/Users/nn/AppData/Local/youdao/dict/Application/8.9.6.0/resultui/html/index.html" \l "/javascript:;) information of the three datasets(GSE13601(57), GSE34105(78), GSE34106(43)).**

|  | KEGG pathway |
| --- | --- |
| hsa04061 | Viral protein interaction with cytokine and cytokine receptor |
| Hsa05340 | Primary immunodeficiency |
| Hsa04657 | IL-17 signaling pathway |
| Hsa05323 | Rheumatoid arthritis |
| Hsa04060 | Cytokine-cytokine receptor interaction |
| Hsa04650 | Natural killer cell mediated cytotoxicity |

**Supplementary table 2**

**The KEGG correspondence of the first six up-regulated pathways.**
